# Supplementary material for: Searching for New Tools to Counteract the Helicobacter pylori Resistance: The Positive Action of Resveratrol Derivatives
Source: PubMed Central journal article supplement (PMC7763357; doi:10.3390/antibiotics9120891), 2020-12-10
Supplement: antibiotics-09-00891-s001.pdf [file antibiotics-09-00891-s001.pdf]

## Supplementary Material

Searching for new tools to counteract the *Helicobacter pylori* resistance: the positive action of resveratrol derivatives

Paola Di Fermo<sup>1#</sup>, Silvia Di Lodovico<sup>1#</sup>, Rosa Amoroso<sup>1</sup>, Barbara De Filippis<sup>1</sup>, Simonetta D'Ercole<sup>2</sup>, Emanuela Di Campli<sup>1</sup>, Luigina Cellini<sup>1\*</sup> and Mara Di Giulio<sup>1</sup>

- <sup>1</sup> Department of Pharmacy, "University "G. d'Annunzio" Chieti-Pescara, Via dei Vestini 31, 66100 Chieti (CH), Italy; [paola.difermo@unich.it](mailto:paola.difermo@unich.it) (P.D.F.); [silvia.dilodovico@unich.it](mailto:silvia.dilodovico@unich.it) (S.D.L.); [rosa.amoroso@unich.it](mailto:rosa.amoroso@unich.it) (R.A.); [barbara.defilippis@unich.it](mailto:barbara.defilippis@unich.it) (B.D.F.); [e.dicamplici@unich.it](mailto:e.dicamplici@unich.it) (E.D.C.); [l.cellini@unich.it](mailto:l.cellini@unich.it) (L.C.); [mara.digiulio@unich.it](mailto:mara.digiulio@unich.it) (M.D.G.)
- <sup>2</sup> Department of Medical Oral and Biotechnological Sciences, University "G. d'Annunzio" Chieti-Pescara, Via dei Vestini 31, 66100 Chieti (CH), Italy; [simonetta.dercole@unich.it](mailto:simonetta.dercole@unich.it) (S.D.E)

\* Correspondence: [l.cellini@unich.it](mailto:l.cellini@unich.it) Tel.: +39-0871-3554560

# Paola Di Fermo and Silvia Di Lodovico contributed equally to this work

**Table S1** Antimicrobial susceptibility panel of *H. pylori* clinical strains used in this study

| <i>H. pylori</i> | Antimicrobials* |     |     |      |     |     |     |     |      |
|------------------|-----------------|-----|-----|------|-----|-----|-----|-----|------|
|                  | CLA             | MET | LVX | MOXI | CIP | RIF | TET | AMP | AMOX |
| <b>11F/11</b>    | R               | S   | R   | R    | R   | S   | S   | S   | S    |
| 2A/12            | R               | R   | R   | R    | R   | S   | S   | S   | S    |
| 7A/12            | S               | S   | R   | R    | R   | S   | S   | S   | S    |
| 12A/12           | R               | S   | R   | R    | R   | S   | S   | S   | S    |
| 5A/13            | R               | R   | R   | R    | R   | S   | S   | S   | S    |
| 13A/13           | R               | R   | R   | R    | R   | S   | S   | S   | S    |
| 26A/13           | R               | R   | R   | R    | R   | S   | S   | S   | S    |
| ATCC 43629       | S               | S   | S   | S    | S   | S   | S   | S   | S    |

\*Abbreviations: CLA, clarithromycin; MET, metronidazole; LVX, levofloxacin; MOXI, moxifloxacin; CIP, ciprofloxacin; RIF, rifabutin; TET, tetracycline; AMP, ampicillin; AMOX, amoxicillin.
